# Supplementary material
Source: publisher figshare collection journal article supplement (https://acs.figshare.com/ndownloader/files/17387492)
Supplement: Supplementary file 1 [file 17387492]

Supporting Information

**Spectral Properties and Excitation Relaxation of Novel Fucoxanthin Chlorophyll  
a/c-Binding Protein Complexes**

Yoshifumi Ueno,<sup>¶</sup> Ryo Nagao,<sup>†,\*</sup> Jian-Ren Shen,<sup>†</sup> and Seiji Akimoto<sup>¶,\*</sup>

<sup>¶</sup>*Graduate School of Science, Kobe University, Kobe 657-8501, Japan*

<sup>†</sup>*Research Institute for Interdisciplinary Science and Graduate School of Natural  
Science and Technology, Okayama University, Okayama 700-8530, Japan*

\*Corresponding Authors:

Ryo Nagao, TEL/FAX: +81-86-251-8630, E-mail: nagaoryo@okayama-u.ac.jp

Seiji Akimoto, TEL/FAX: +81-78-803-5705, E-mail: akimoto@hawk.kobe-u.ac.jp

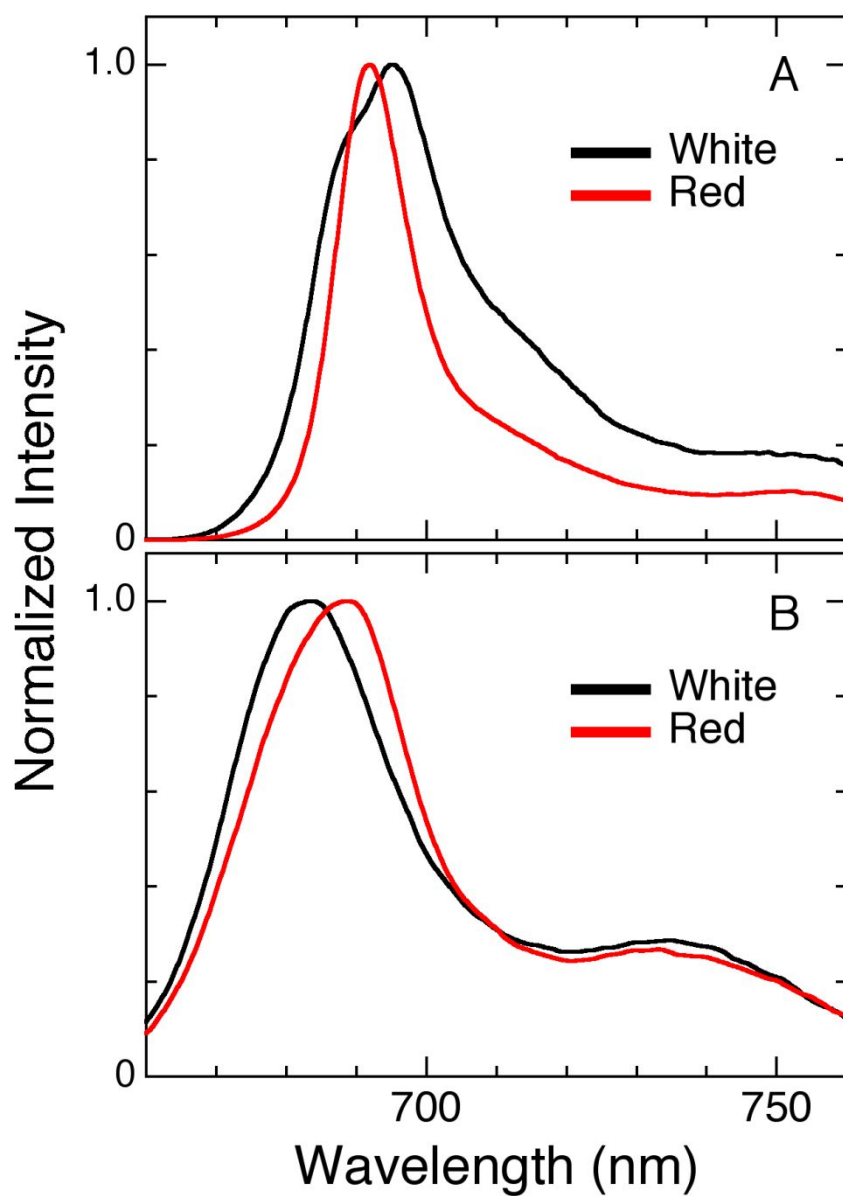

**Figure S1.** Steady-state fluorescence spectra at 77 K (A) and room temperature (B) of *Chaetoceros gracilis* cells grown under the red LED (red line) and the white LED (black line). The spectra are normalized by the peak intensity.

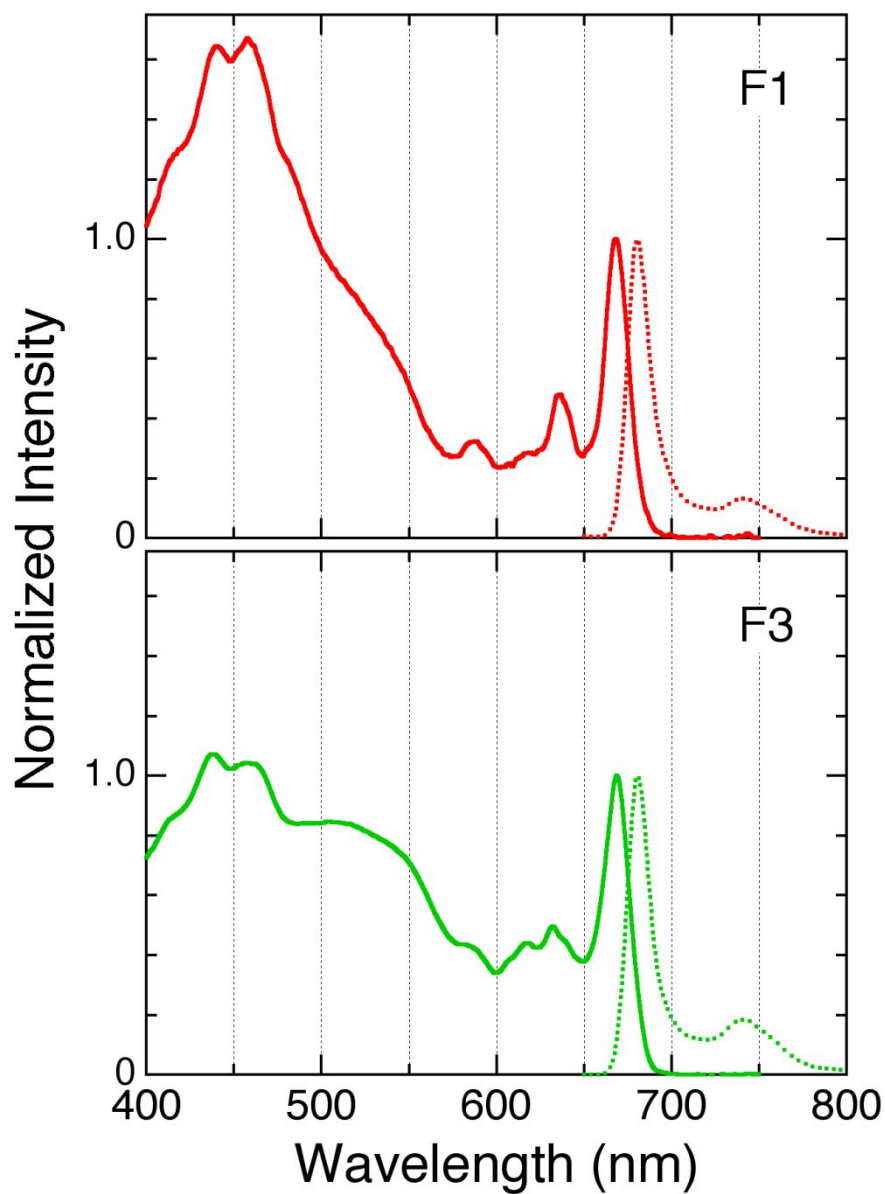

**Figure S2.** Steady-state absorption (solid line) and fluorescence (dotted line) spectra at 77 K of the F1 (red) and F3 (green) complexes from the white-grown cells. The absorption and fluorescence spectra are normalized at the peak of the Chl *a* Qy band (~669 nm) and the peak intensity, respectively. The excitation wavelength was 459 nm for fluorescence spectra.

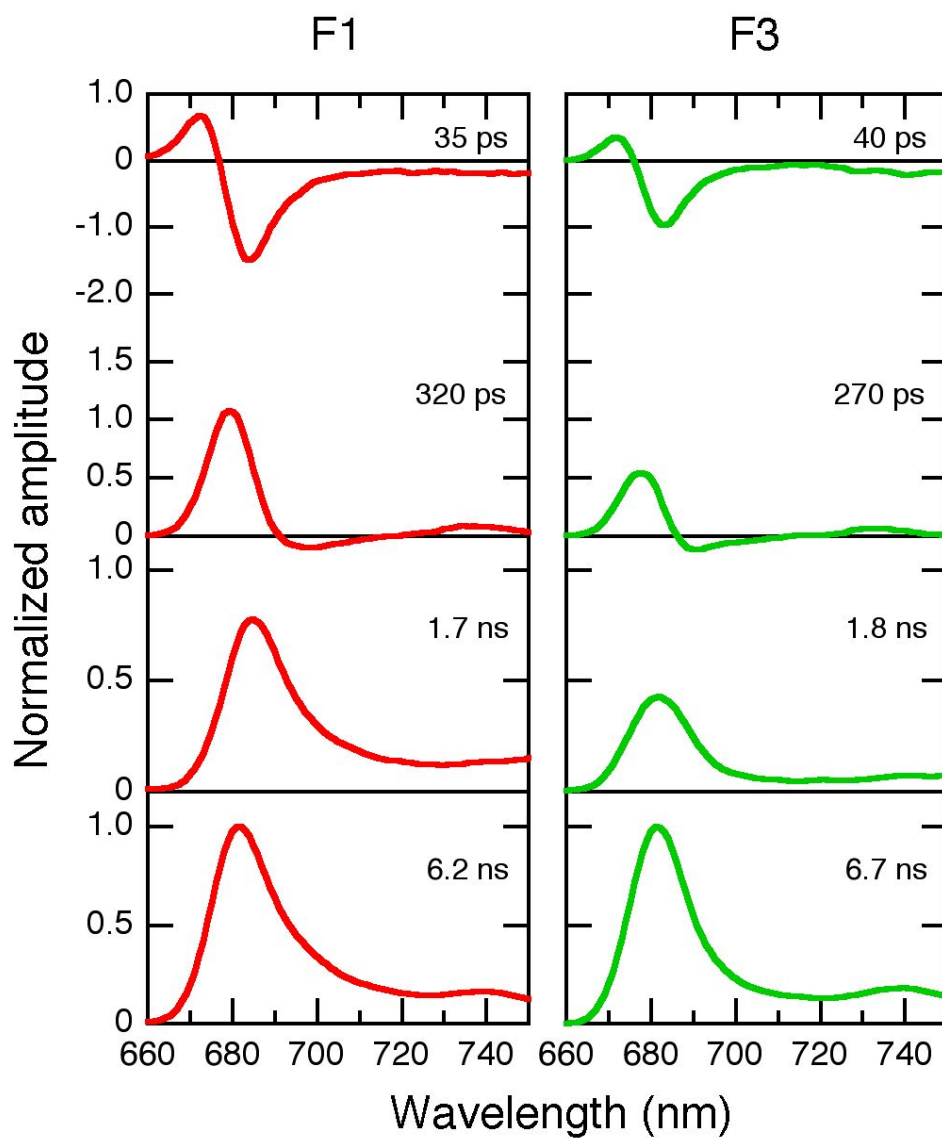

**Figure S3.** Fluorescence decay-associated spectra at 77 K of the F1 (red) and F3 (green) complexes from the white-grown cells, normalized by the peak intensity of the respective 4th FDA spectrum. The excitation wavelength was 459 nm.

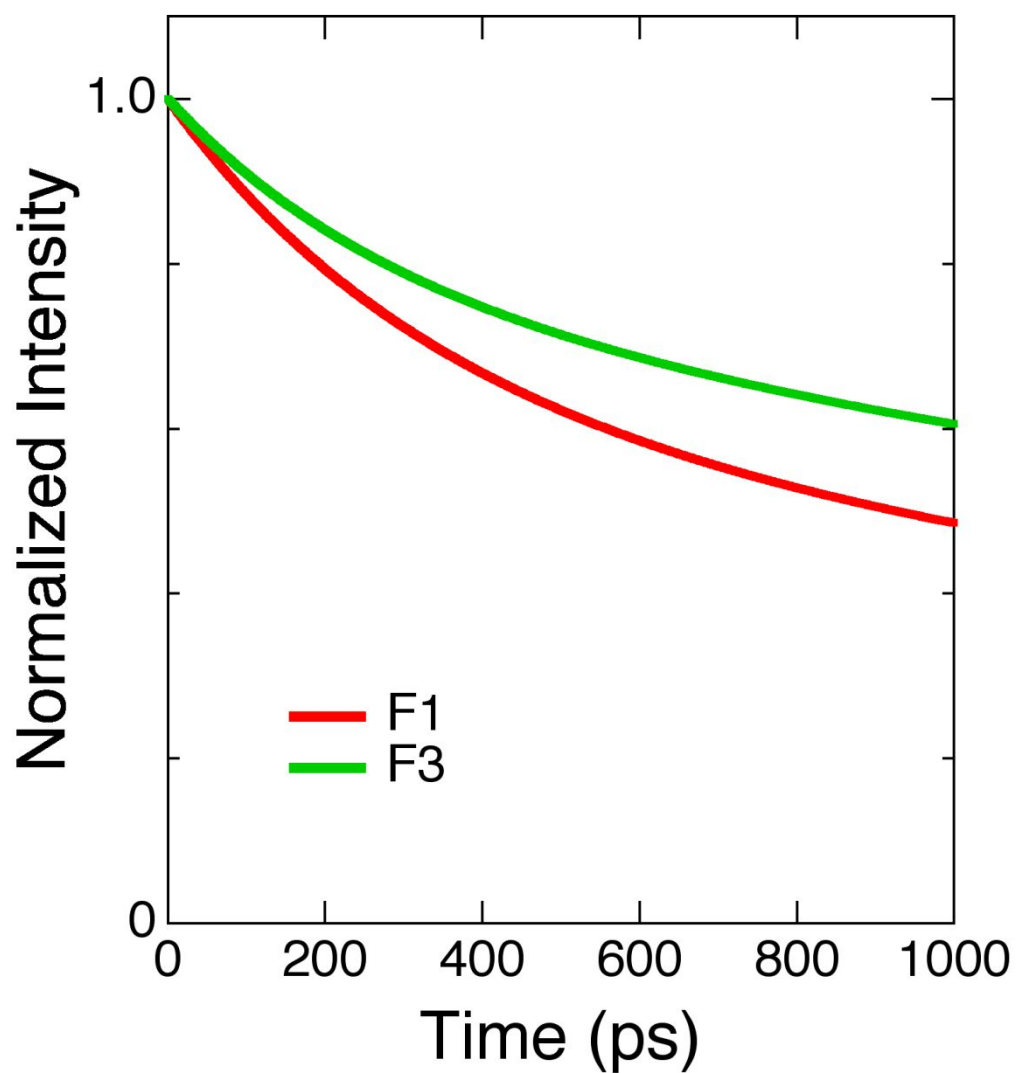

**Figure S4.** Fluorescence decay curves of the F1 (red) and F3 (green) complexes from the white-grown cells, reconstructed from the positive amplitudes and time constants of the FDA spectra at 77 K (Figure S3).
